# Supplementary material for: Urinary mRNA Expression of Glomerular Podocyte Markers in Glomerular Disease and Renal Transplant
Source: MDPI journal article supplement (doi:10.3390/diagnostics11081499), 2021-08-20
Supplement: s1 [file s1]

## Supplementary Material

### Materials and Methods

#### *Human Immortalized Podocytes Culture*

hPODO were grown for propagation at 33 °C, 5% CO<sub>2</sub> in RPMI supplemented with 10% foetal bovine serum (FBS), 100 U/mL penicillin, 100 µg/mL streptomycin, and 2 mM L-glutamine (all reagents from Sigma-Aldrich, Milan, Italy). For differentiation, the cells were subsequently grown in the same medium with the addition of 5 µg/mL human apo-transferrin, 10<sup>-7</sup> M hydrocortisone, 5 ng/mL sodium selenite, in culture flasks (Corning, Milan, Italy) pre-coated with collagen type IV and thermoshifted to 37 °C for 7 days.

#### *Urinary Cells Culture*

For the culture, the cells were washed with cold sterile PBS and diluted in DMEM: F12 medium supplemented with 10% FBS, 5 µg/mL human apo-transferrin, 10<sup>-7</sup> M hydrocortisone, 5 ng/mL sodium selenite, 0.12 U/mL insulin, 100 U/mL penicillin, 100 µg/mL streptomycin, and 2 mM L-glutamine (all reagents from Sigma-Aldrich). Day-to-day cell adhesion was checked and images were taken by a Zeiss Axiovert 25 Microscope (Carl Zeiss SpA, Arese, Milan, Italy) for a total of 15 days. Samples with bacteriuria or other contaminations were excluded from the procedure. After adhesion, the cells plated on the chamber slide were frozen at -40°C for later characterization of cell types by immunofluorescence analysis.

#### *RTqPCR*

We considered and measured in this paper the following genes: *NPHS1*, *NPHS2*, *WT1*, *SYNPO*, *TRPC6*, *GRM1*, *NEUROD1*, *GAPDH*, *RPL13*, *B2M*, and *18sRNA* (Supplementary Table S1).

**Supplementary Table S1.** Primer sequences. The following sequences of oligonucleotide primers were used.

| GenBank      | Gene    | Forward primer sequence (5'-3') | Reverse primer sequence (5'-3') |
|--------------|---------|---------------------------------|---------------------------------|
| NM_004646    | NPHS1   | CAACTGGGAGAGACTGGGAGAA          | AATCTGACAACAAGACGGAGCA          |
| NM_014625    | NPHS2   | AAGAGTAATATATTCGACTGGGACAT      | TGGTCACGATCTCATGAAAAGG          |
| NM_007286    | SYNPO   | CCCAAGGTGACCCGAAT               | CTGCCGCCGCTTCTCA                |
| NM_000378    | WT1     | GCATCTGAGACCAAGTGAGAAA          | TCCTGCTGTGCATCTGTAAG            |
| NM_002500    | NEUROD1 | CACGCCAGTTTCACCATTTT            | TGCAGCAGTAGTACCCAAAG            |
| NM_004621    | TRPC6   | CTACTTTGAGGAGGGCAGAAC           | CCCTGGAACAGCTCAGAAAT            |
| NM_001278064 | GRM1    | GTATCCTACGCCTCTGTCATT           | GATCTCTGGCTTGCTTGCT             |
| NM_000977    | RPL13   | CCAGACACCAAGGTATGAGATG          | GTCCATGAAGCAAGAACAATGG          |
| NM_004048    | B2M     | CCAGCGTACTCCAAAGATTCA           | TGGATGAAACCCAGACACATAG          |
| NM_002046    | GAPDH   | GGTGTGAACCATGAGAAGTATGA         | GAGTCCTTCCACGATACCAAAG          |
| X03205       | 18SrRNA | GCCCGAAGCGTTTACTTTGA            | TCCATTATTCTAGCTGCGGTATC         |

### Results

#### *Cell Morphology and Growth*

Urinary cells were maintained in culture and microscopy inspection was performed day-by-day for 14 days (Supplementary Figure S1).

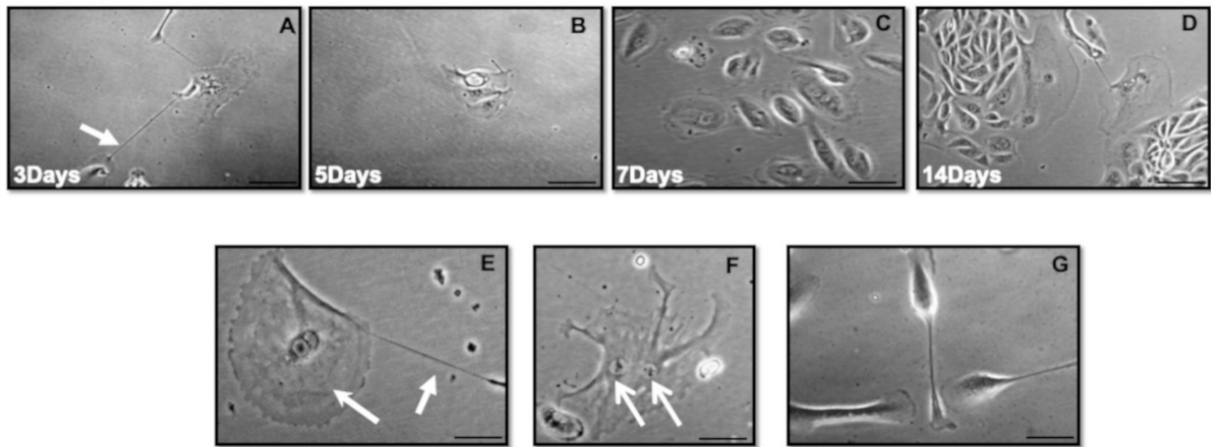

**Supplementary Figure S1.** Urinary cells culture morphology. Urinary cells were seeded in a flask for a culture in selective conditions for podocytes. After 2–3 days, cells of different kinds adhered or detached and were maintained in culture for 14 days. Light-inverted microscope images were acquired for 14 days (14d). Podocytes are recognizable by their processes (A–E), a large cytoskeleton (A,C,D,E), by a low duplication capacity (B) other than double nucleus (C–F), and processes trying to connect with those of other cells by synaptic-like structures (G). Scale bar for subfigures A–F is 100  $\mu$ M; G 200  $\mu$ M.

The characterization of podocytes was confirmed by immunocytochemistry staining (Supplementary Figure S2: Urinary podocytes characterization).

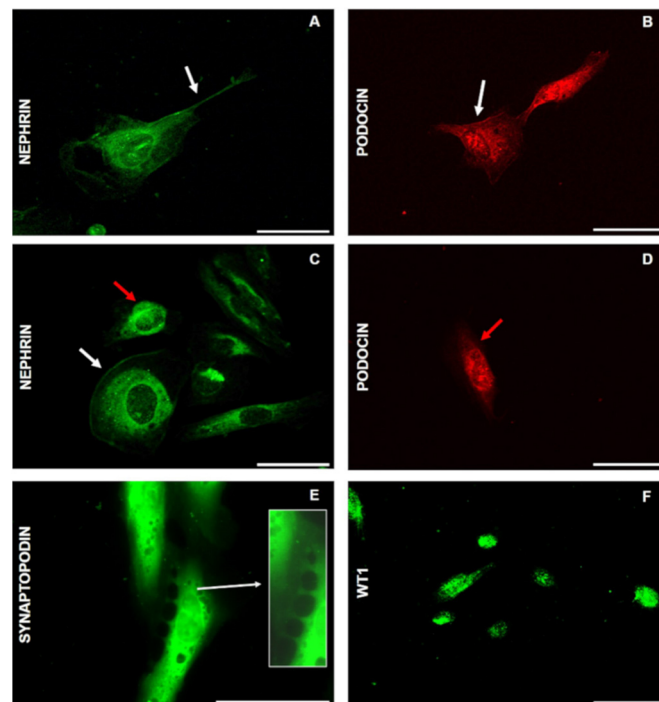

**Supplementary Figure S2.** Urinary podocytes characterization. Immunofluorescence staining was used to characterize podocytes. Podocytes expressed nephryn on cell membrane and foot processes (white arrow) (A–C) or into the cytoplasm (red arrow) (C); podocin was detected on the membrane (white arrow) (B) or in the cytoplasm (red arrow) (D); synaptopodin was found in cytoplasm and in the foot processes (E), and WT1 (F) in the nucleus, as expected. Scale bar is 100  $\mu$ M.

*Correlation among the Different Markers, after Normalization for Total Number of Cells*

Pearson correlation among gene expression was performed in both RTx and N group after *GAPDH* and UC normalization after log + 1 transformation.

**Supplemenatry Table S2.** Correlation among gene expression. Pearson’s correlation was performed after *GAPDH* and UC normalization.

| RTx                 | NPHS1 | NPHS2 | WT1   | SYNPO | N                   | NPHS1 | NPHS2 | WT1  | SYNPO |
|---------------------|-------|-------|-------|-------|---------------------|-------|-------|------|-------|
| NPHS1               |       |       |       |       | NPHS1               |       |       |      |       |
| Pearson correlation |       | 0.28  | -0.10 | -0.08 | Pearson correlation |       | -0.29 | 0.16 | 0.25  |
| P value             |       | 0.25  | 0.70  | 0.77  | p value             |       | 0.41  | 0.55 | 0.34  |
| NPHS2               |       |       |       |       | NPHS2               |       |       |      |       |
| Pearson correlation | 0.28  |       | -0.02 | 0.17  | Pearson correlation | 0.41  |       | 0.34 | 0.39  |
| p value             | 0.25  |       | 0.93  | 0.49  | p value             | 0.41  |       | 0.37 | 0.27  |
| WT1                 |       |       |       |       | WT1                 |       |       |      |       |
| Pearson correlation | -0.10 | -0.02 |       | 0.21  | Pearson correlation |       | 0.34  |      | 0.73  |
| p value             | 0.70  | 0.93  |       | 0.42  | p value             |       | 0.37  |      | 0.06  |
| SYNPO               |       |       |       |       | SYNPO               |       |       |      |       |
| Pearson correlation | -0.08 | 0.17  | 0.21  |       | Pearson correlation | 0.25  | 0.39  | 0.73 |       |
| p value             | 0.77  | 0.49  | 0.42  |       | p value             | 0.34  | 0.27  | 0.06 |       |
